# Supplementary material for: Primer Choice and Xylem-Microbiome-Extraction Method Are Important Determinants in Assessing Xylem Bacterial Community in Olive Trees
Source: MDPI journal article supplement (doi:10.3390/plants11101320), 2022-05-16
Supplement: s1 [file s1]

**Table S1.** Primers sequences and target region of rRNA used in the metabarcoding analysis of olive xylem sap.

| PCR  | Primers Pairs | Primer Forward      | Primer Reverse     | Region | Size (pb) | References                                                              |
|------|---------------|---------------------|--------------------|--------|-----------|-------------------------------------------------------------------------|
| PCR1 | 799F+1062R    | AACMGGATTAGATACCKG  | CTCACRRCACGAGCTGAC | V5-V6  | 270       | (Chelius and Triplett, 2001; Diskin et al., 2017)                       |
| PCR2 | 799F+1115R    | AACMGGATTAGATACCKG  | AGGGTTGCGCTCGTTG   | V5-V6  | 320       | (Laforest-Lapointe et al., 2017)                                        |
| PCR3 | 967F+1391R    | CAACGCGAAGAACCTTACC | GACGGGCGGTGWGTRCA  | V6- V8 | 430       | (Callahan et al., 2016; Sogin et al., 2006; Walker and Pace, 2007)      |
| PCR4 | 799F+1193R    | AACMGGATTAGATACCKG  | ACGTCATCCCCACCTTCC | V5- V7 | 400       | (Beckers et al., 2016; Bodenhausen et al., 2013; Walker and Pace, 2007) |
