# Supplementary figures and images for: Primer Choice and Xylem-Microbiome-Extraction Method Are Important Determinants in Assessing Xylem Bacterial Community in Olive Trees
Source: MDPI journal article supplement (doi:10.3390/plants11101320), 2022-05-16

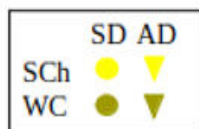

**PCR1 – 799F/1062R**

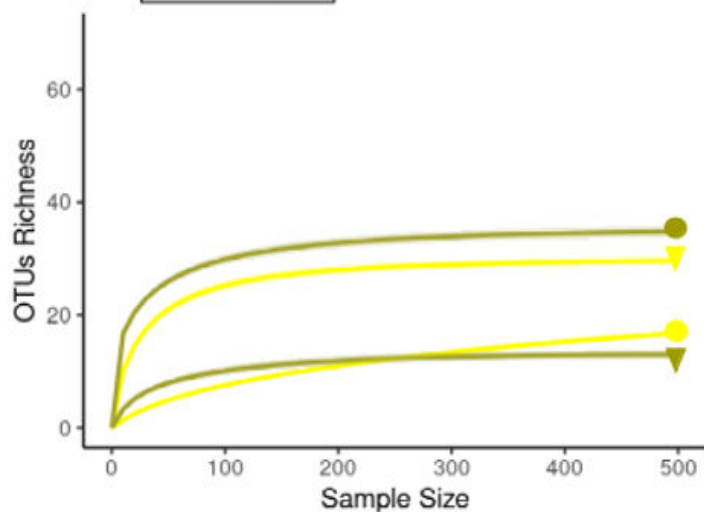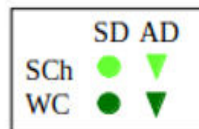

**PCR2 – 799F/1115R**

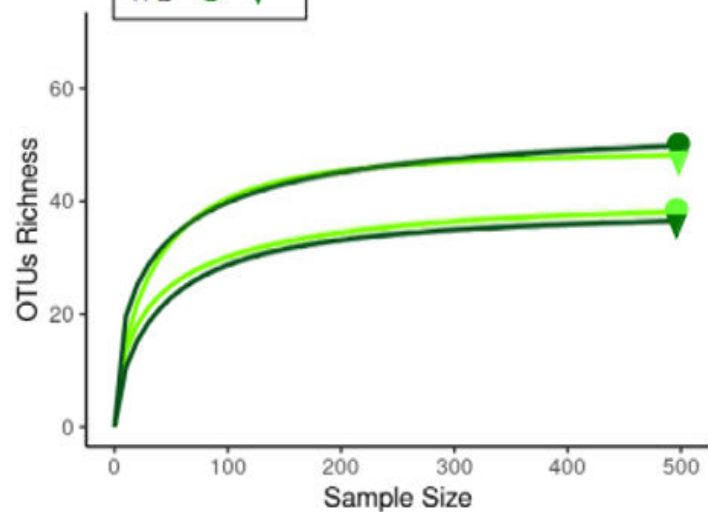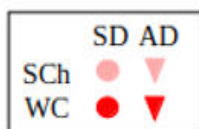

**PCR3 – 967F/1391R**

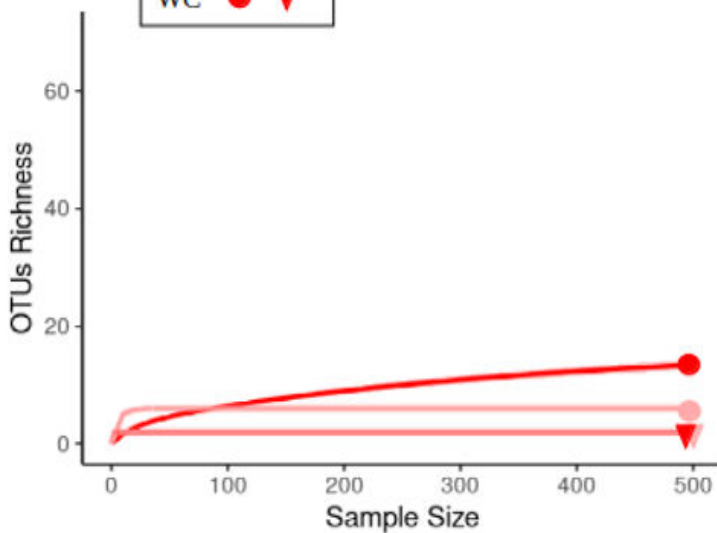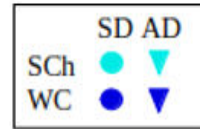

**PCR4 – 799F/1193R**

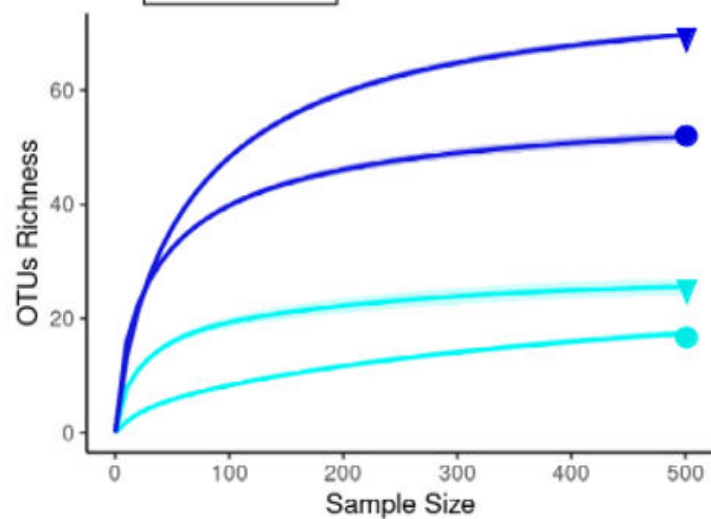

Supplement: s1 [file s1]

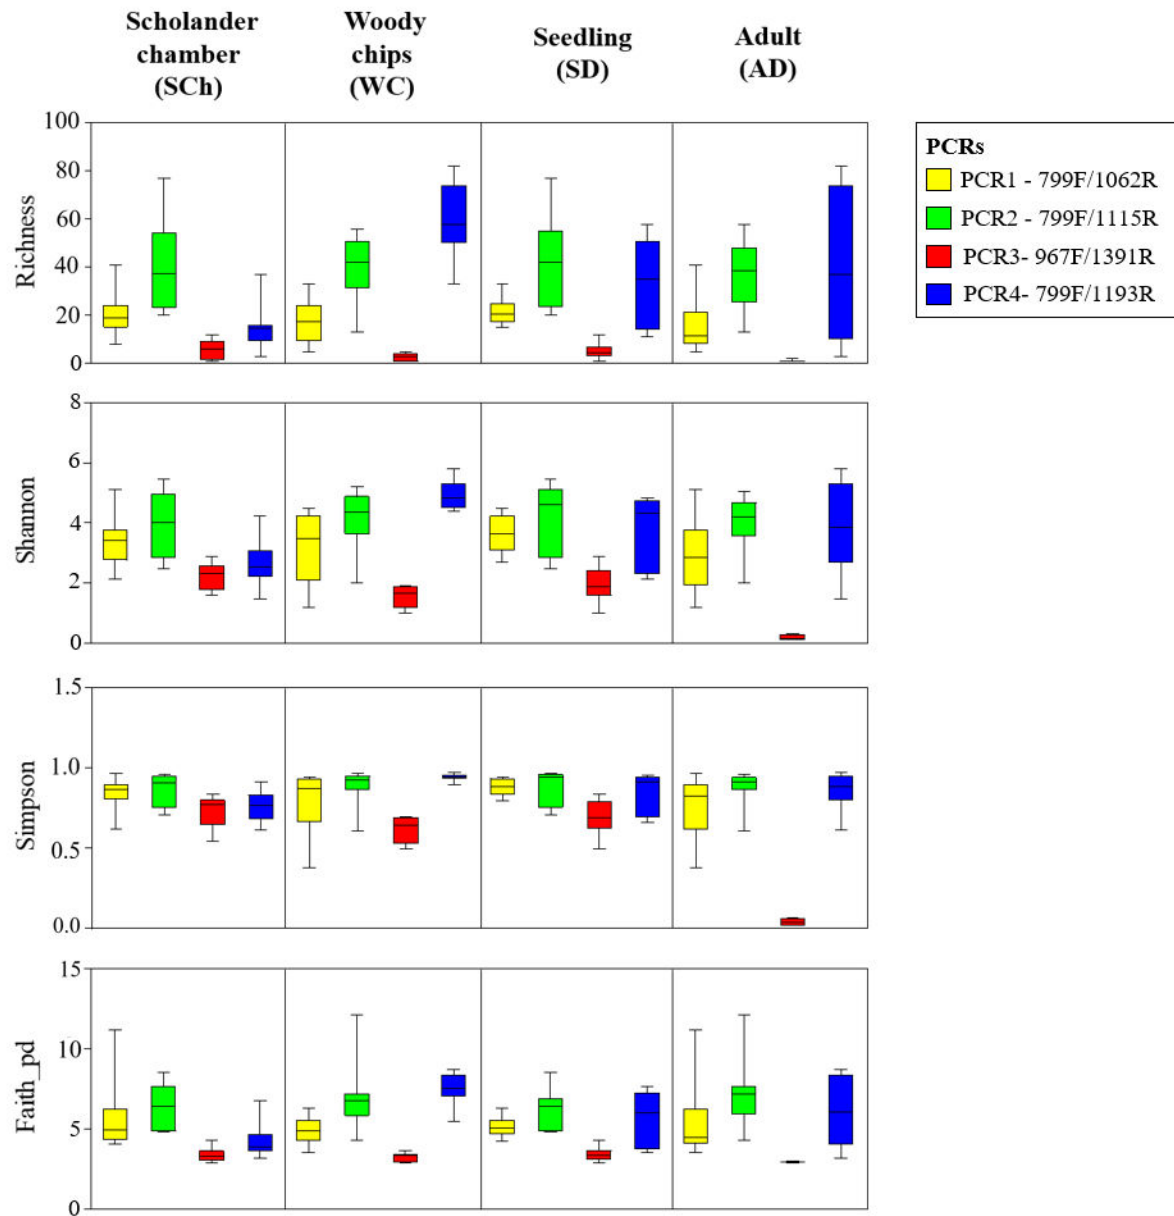

Supplement: s1 [file s1]

## Scholander chamber (SCh)

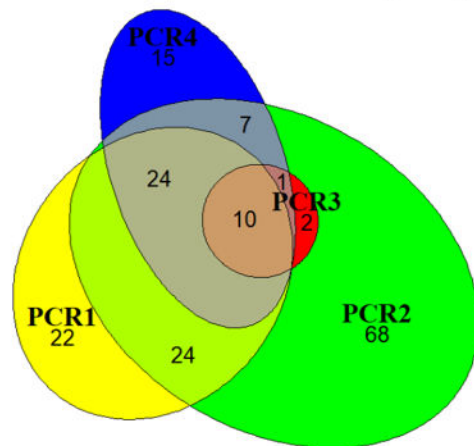

## Woody chips (WC)

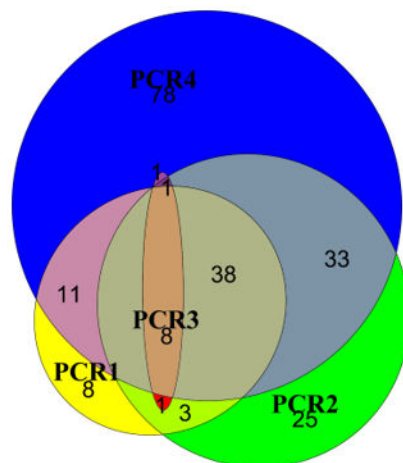

### PCRs

PCR1 - 799F/1062R

PCR2 - 799F/1115R

PCR3- 967F/1391R

PCR4- 799F/1193R

## Seedling (SD)

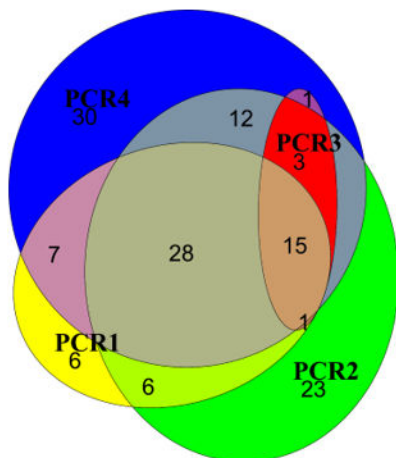

## Adult (AD)

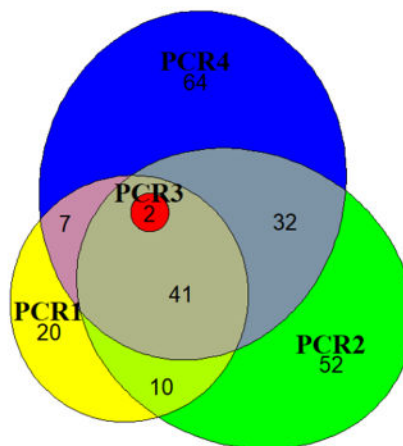

Supplement: s1 [file s1]

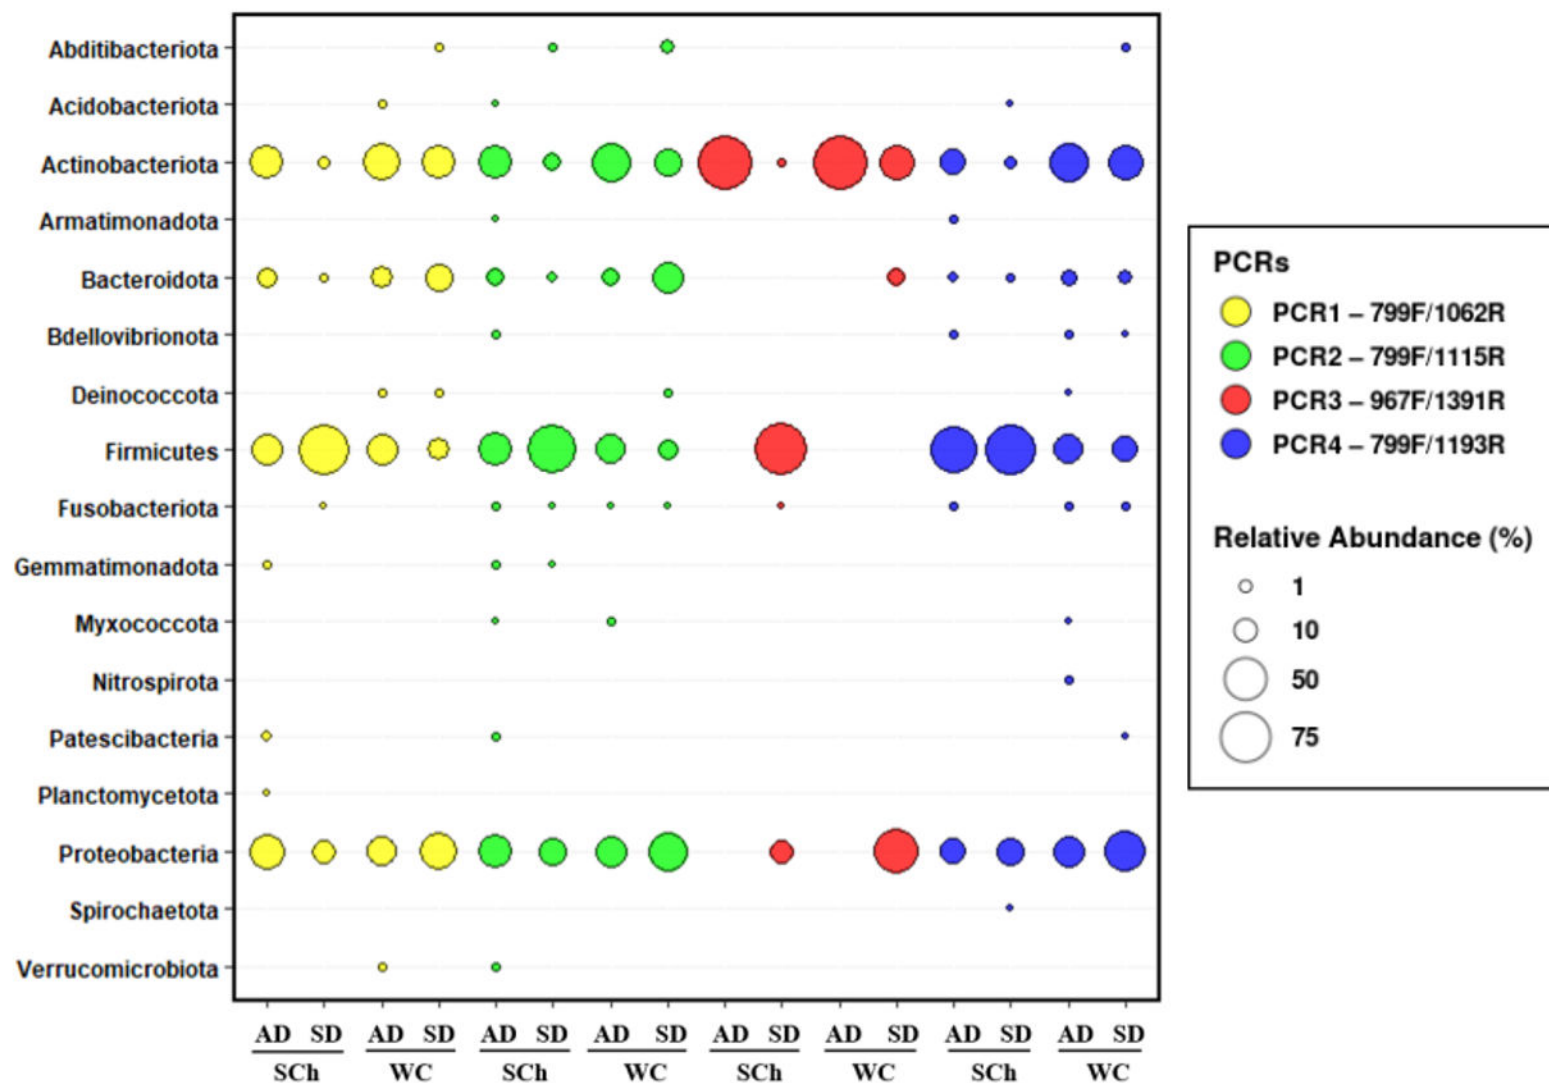

Supplement: s1 [file s1]

## Scholander chamber

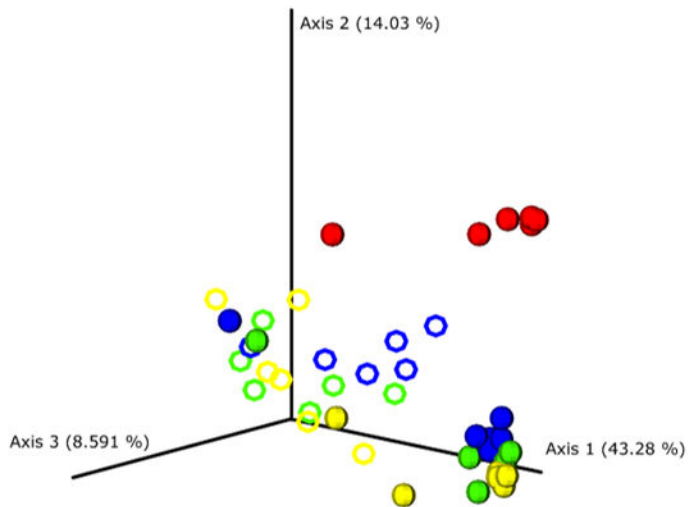

## Woody chips

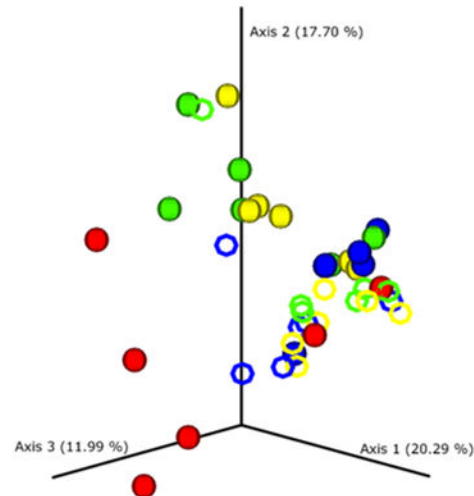

PCRs

PCR1 - 799F/1062R

PCR2 - 799F/1115R

PCR3- 967F/1391R

PCR4- 799F/1193R

○ AD

● SD

## Seedling

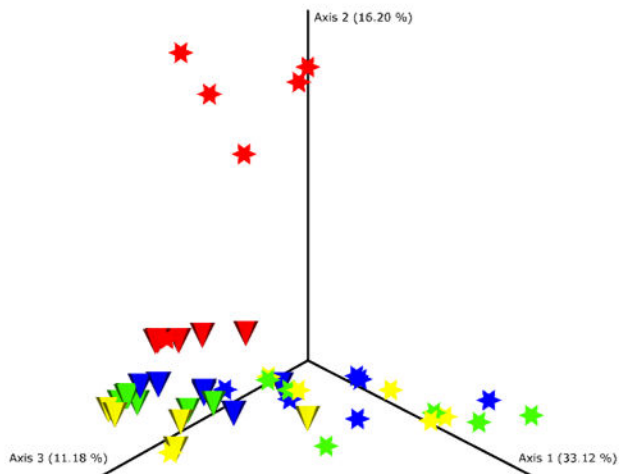

## Adult

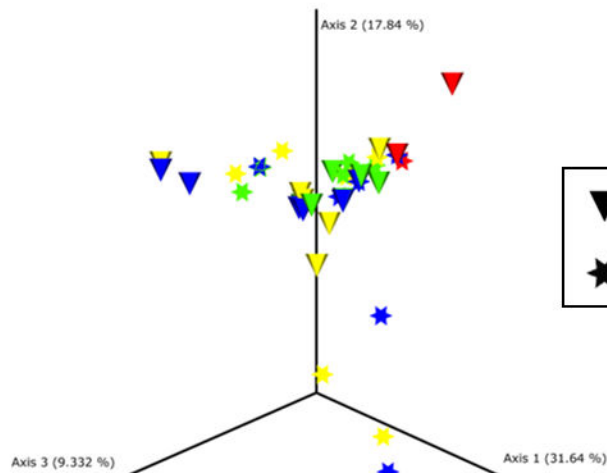

▼ Sch

★ WC

Supplement: s1 [file s1]
